# Supplementary material for: Photocontrolled heterojunctions constructed from holmium single atom modified Mg1.2Ti1.8O5/g-C3N4 with enhanced photocatalytic CO2 conversion
Source: Royal Society of Chemistry journal article supplement (doi:10.1039/d4ee00572d), 2024-01-01
Supplement: d4ee00572d1.pdf [file d4ee00572d1.pdf]

## Supporting Information

# Photocontrolled Heterojunctions Constructed from Holmium Single Atom Modified $\text{Mg}_{1.2}\text{Ti}_{1.8}\text{O}_5/\text{g-C}_3\text{N}_4$ with Enhanced Photocatalytic $\text{CO}_2$ Conversion

Jing An, Shuang Ge, Guofeng Wang\*, and Honggang Fu\*

### Table of Contents

1. Experimental Procedures
2. Supplementary Tables S1-S12
3. Supplementary Figures S1-S40
4. References

### Experimental Procedures

#### **Chemicals**

All reagents and solvents, including analytical-grade magnesium acetate, tetrabutyl peptide, urea, ethanol, and  $\text{Ho}(\text{NO}_3)_3 \cdot 6\text{H}_2\text{O}$ , were used as received without further purification.

#### **Characterizations**

The morphology and size of the samples were analyzed by transmission electron microscope (TEM, JEM-2100, Japan) and scanning electron microscopy (SEM, Hitachi, S-4800). X-ray diffraction (XRD) patterns were recorded on a Bruker D8 Advance diffractometer equipped with  $\text{Cu K}\alpha$  radiation ( $\lambda = 1.5406 \text{ \AA}$ , 40 kV, 40 mA).

Atomic force microscopy (AFM) images were performed using an atomic force microscope (SPA-400, Japan). Fourier transforms infrared (FTIR) spectra were measured on a Perkin-Elmer Spectrum One FTIR spectrometer using the KBr particle method. UV-Vis absorption spectra were recorded on a UV spectrophotometer (SHIMADZU UV-2550) in the wavelength range of 200-800 nm. Photoluminescence (PL) spectra were measured using a Hitachi F-4600 fluorescence spectrophotometer equipped with a 150 W Xe lamp. X-ray photoelectron spectroscopy (XPS) analysis was performed on a Thermo Fisher Scientific K-Alpha spectrometer (Waltham, MA, USA) employing a monochromatic Al K $\alpha$  X-ray source ( $h\nu = 1486.8$  eV). In situ-XPS analysis was performed on a ThermoFischer ESCALAB 250Xi spectrometer after exposing the samples to visible or ultraviolet light for 5 hours. High Angle Annular Dark Field Image-Scanning Transmission Electron Microscope (HAADF-STEM) images with atomic resolution were investigated using a JEM-ARM300F transmission electron microscope (TEM) equipped with a probe spherical aberration corrector.

## **Methods**

### **Section S1. Synthesis of Mg<sub>1.2</sub>Ti<sub>1.8</sub>O<sub>5</sub> and Mg<sub>1.2</sub>Ti<sub>1.8</sub>O<sub>5</sub>:Ho<sup>3+</sup>.**

A certain amount of Mg(CH<sub>3</sub>COO)<sub>2</sub>·4H<sub>2</sub>O was evenly dissolved in 30 ml ethanol solution, and then 950  $\mu$ l Ti(OC<sub>4</sub>H<sub>9</sub>)<sub>4</sub> was rapidly added into the above solution. After continuous stirring for 1 hour, the mixed solution was transferred to a high-pressure reactor, calcined at 180 °C for 24 hours. After cooling to room temperature, the product was washed with ethanol for three times and then dried at 60 °C. The dried powder was ground and placed in a muffle furnace and calcined at 600 °C for 2 hours at a heating rate of 1 °C/min, then naturally cooled to room temperature to obtain the Mg<sub>1.2</sub>Ti<sub>1.8</sub>O<sub>5</sub> sample. The synthesis process of Mg<sub>1.2</sub>Ti<sub>1.8</sub>O<sub>5</sub>:Ho<sup>3+</sup> is similar to that of Mg<sub>1.2</sub>Ti<sub>1.8</sub>O<sub>5</sub>, except that magnesium acetate is replaced by Ho(NO<sub>3</sub>)<sub>3</sub>·6H<sub>2</sub>O in the initial reaction stage.

### **Section S2. Synthesis of ultra-thin g-C<sub>3</sub>N<sub>4</sub> and g-C<sub>3</sub>N<sub>4</sub>:Ho<sup>3+</sup> nanosheets.**

First, 35 g urea was put into a 100 mL covered crucible and heated at 550 °C in Muffle furnace (at a rate of 0.5 °C/min) for 3 h. After natural cooling to room temperature, the

obtained light yellow powder was carefully ground evenly. The ground sample was labeled as g-CN. To further obtain ultra-thin g-C<sub>3</sub>N<sub>4</sub> nanosheets, 1 g of the synthesized g-CN was placed in an open ceramic vessel and calcined for a second time at 550 °C for 2 h. After cooling to room temperature, the powder was ground again and added into three bottles containing 100 mL 2 M HNO<sub>3</sub> solution, refluxed at 120 °C for 2 hours. The reflux products were naturally cooled to room temperature, washed with deionized water for 5 times to neutral, and finally washed with ethanol for 3 times to obtain ultra-thin g-C<sub>3</sub>N<sub>4</sub> nanosheets, labeled as CN. The synthesis process of CN:Ho<sup>3+</sup> is similar to that of CN, except that Ho(NO<sub>3</sub>)<sub>3</sub>·6H<sub>2</sub>O is added into the reaction solution in the initial reaction stage.

**Section S3. Synthesis of Mg<sub>1.2</sub>Ti<sub>1.8</sub>O<sub>5</sub>:Ho/g-C<sub>3</sub>N<sub>4</sub>:Ho.** For the chemisorption method, a certain mass of g-C<sub>3</sub>N<sub>4</sub>:Ho was added into methanol solution, and completely dispersed through ultrasound for 30 min. Then a certain mass of Mg<sub>1.2</sub>Ti<sub>1.8</sub>O<sub>5</sub>:Ho was added to the above solution and continue ultrasound for 30 min. Finally, the product was thoroughly stirred until the solvent completely evaporated. For the in-situ synthesis, the prepared ultra-thin g-C<sub>3</sub>N<sub>4</sub>:Ho nanosheets was add into the mixed solution of Ti(OC<sub>4</sub>H<sub>9</sub>)<sub>4</sub> and Mg(CH<sub>3</sub>COO)<sub>2</sub>·4H<sub>2</sub>O, and further stirred for 30 min. The above mixed solution was transferred to a reactor and calcined at 180 °C for 24 h. After cooling to room temperature, the product was washed with ethanol for three times and then dried at 60 °C. The dried powder were ground and placed in a muffle furnace and calcined at 600 °C for 2 hours at a heating rate of 1 °C/min, then naturally cooled to room temperature to obtain the Mg<sub>1.2</sub>Ti<sub>1.8</sub>O<sub>5</sub>:Ho/g-C<sub>3</sub>N<sub>4</sub>:Ho. The obtained product is named Mg<sub>1.2</sub>Ti<sub>1.8</sub>O<sub>5</sub>:Ho/g-C<sub>3</sub>N<sub>4</sub>:Ho-SS. It is noted that the photocatalytic performance of the optimized Mg<sub>1.2</sub>Ti<sub>1.8</sub>O<sub>5</sub>:Ho/g-C<sub>3</sub>N<sub>4</sub>:Ho-SS sample by the in-situ synthesis was lower than that of Mg<sub>1.2</sub>Ti<sub>1.8</sub>O<sub>5</sub>:Ho/g-C<sub>3</sub>N<sub>4</sub>:Ho by the chemisorption method, which can be attributed to the destruction of the ultra-thin structure of CN during in situ synthesis.

**Section S4. X-ray absorption spectroscopy (XAFS) measurements.**

The XAFS study was performed at the BL14B2\* of SPring-8 (8 GeV, 100 mA), Japan, in which, the X-ray beam was mono-chromatized with water-cooled Si (111) double-crystal monochromator and focused with two Rh coated focusing mirrors with the beam

size of 2.0 mm in the horizontal direction and 0.5 mm in the vertical direction around sample position, to obtain X-ray adsorption fine structure (XAFS) spectra both in near and extended edge.  $\text{Ho}_2\text{O}_3$  samples were used as references. For Wavelet Transform analysis, the  $\chi(k)$  exported from Athena was imported into the Hama Fortran code. The parameters were listed as follow: R range, 1 - 4 Å, k range, 0 - 12.0 Å<sup>-1</sup>; k weight, 2; and Morlet function with  $\kappa=15$ ,  $\sigma=1$  was used as the mother wavelet to provide the overall distribution (Reference 1). Data reduction, data analysis, and EXAFS fitting were performed and analyzed with the Athena and Artemis programs of the Demeter data analysis packages (Reference 2) that utilizes the FEFF6 program (Reference 3) to fit the EXAFS data. The energy calibration of the sample was conducted through standard and  $\text{Ho}_2\text{O}_3$ , which as a reference was simultaneously measured. A linear function was subtracted from the pre-edge region, then the edge jump was normalized using Athena software. The  $\chi(k)$  data were isolated by subtracting a smooth, third-order polynomial approximating the absorption background of an isolated atom. The  $k^3$ -weighted  $\chi(k)$  data were Fourier transformed after applying a HanFeng window function ( $\Delta k = 1.0$ ). For EXAFS modeling, The global amplitude EXAFS ( $CN$ ,  $R$ ,  $\sigma^2$  and  $\Delta E_0$ ) were obtained by nonlinear fitting, with least-squares refinement, of the EXAFS equation to the Fourier-transformed data in  $R$ -space, using Artemis software, EXAFS of the  $\text{Ho}_2\text{O}_3$  is fitted and the obtained amplitude reduction factor  $S_0^2$  value (0.794) was set in the EXAFS analysis to determine the coordination numbers ( $CNs$ ) in the Ho-O and Ho-N scattering path in sample.

### **Section S5. Photocatalytic $\text{CO}_2$ reduction measurements.**

A certain amount of sample was dispersed into a cylindrical steel reactor with (4 mL) water. The high-purity  $\text{CO}_2$  gas enters the reaction device through the water to reach the ambient pressure and further remove the original air and impurities in the reaction device, and achieve the adsorption and desorption balance before irradiation. The samples were continuously irradiated with a light intensity of 455  $\text{mW}\cdot\text{cm}^{-2}$  using a 300W Xe lamp with a 400 nm cut-off filter for five hours. Quantitative chromatograph (GC2002) was used to analyze and detect the produced gas. In order to ensure the accuracy of the data, all reported photocatalytic reactions have been tested more than

five times. The photocatalytic reaction was carried out for five cycles, and the time of each photocatalytic reaction was 5 hours. For the calculation of the efficiency ratios of samples containing Ho and samples without Ho under different single wavelength light is based on the method reported in the literatures (*ACS Nano*, 2014, 8, 7229; *JMCA*, 2022, 10, 5990). First, the calculation of quantum efficiency (QE) for CO and CH<sub>4</sub> generations were calculated using the following equation:  $QE = (2 \times \text{CO generation rate} + 8 \times \text{CH}_4 \text{ generation rate}) / (\text{absorption rate of incident photon})$ . And then, the efficiency ratio of g-C<sub>3</sub>N<sub>4</sub>:Ln<sup>3+</sup> (Ln = Y, Gd, Eu, Ho) and g-C<sub>3</sub>N<sub>4</sub> =  $(2 \times \text{CO generation rate} + 8 \times \text{CH}_4 \text{ generation rate of sample containing Ln}) / (2 \times \text{CO generation rate} + 8 \times \text{CH}_4 \text{ generation rate of sample without Ln})$ . Product selectivity of CO =  $(2 \times \text{CO generation rate}) / (2 \times \text{CO generation rate} + 8 \times \text{CH}_4 \text{ generation rate})$ , and product selectivity of CH<sub>4</sub> =  $(8 \times \text{CH}_4 \text{ generation rate}) / (2 \times \text{CO generation rate} + 8 \times \text{CH}_4 \text{ generation rate})$ .

### **Section S6. Measurement of photoelectrochemistry.**

A CHI 660 electrochemical system (Shanghai Chenhua Instruments, China) was used with a 300 W Xe lamp as the light source, the sample film as the working electrode, saturated Ag/AgCl as the reference electrode, platinum foil as the counter electrode, and 0.5 M Na<sub>2</sub>SO<sub>4</sub> aqueous solution for photoelectrochemical measurements. Before testing, the high-purity N<sub>2</sub> was passed through the Na<sub>2</sub>SO<sub>4</sub> electrolyte for 30 min. The working electrode was prepared as follows: under vigorous stirring, the prepared photocatalyst (0.1 g) was added to isopropanol (1 mL), and polyethylene glycol (0.05 g) was added for sonication for 10 min. Subsequently, the solution was further vigorously stirred for 30 minutes, to which acetylacetone (0.05 ml) was added, and the resulting solution was maintained under vigorous stirring for one week. 1 cm × 1 cm conductive fluorine-doped tin oxide (FTO)-coated glass was used as the substrate, and the prepared slurry was coated on the substrate by a doctor blade method. The electrodes were dried at room temperature and finally annealed at 150 °C for 2 h in an N<sub>2</sub> atmosphere.

### **Section S7. Measurement of hydroxyl radicals (•OH).**

The coumarin fluorescence probe method analyzed the amount of •OH produced during the photocatalytic reaction. In this system, the photocatalyst (50 mg) was dissolved in

coumarin aqueous solution (0.001 M, 40 mL), mixed well with constant magnetic stirring for 10 min, and irradiated with a 300 W Xe lamp for 1 h. The solution was then centrifuged and the supernatant passed through a filter into a Pyrex glass cell. The resulting solution was analyzed by fluorescence measurement of 7-hydroxycoumarin using a fluorescence spectrophotometer (Perkin-Elmer LS55) at an excitation wavelength of 390 nm.

### **Section S8. Measurement of transient surface optical voltage (TPV).**

The TPV test was carried out by microchip solid-state lasers, instrument type MCA-355-1-30-02-PD. The experimental light source of TPV was laser with wavelength of 355 nm and frequency of 1 KHz. The pulse nanosecond laser was shot into the photomultiplier tube and the sample cell, respectively, with a pulse width of 1.5 ns and an energy of 30 KJ. The laser intensity is adjusted by a gradient circular neutral filter. The photomultiplier tube records the reference signal, and the sample signal is recorded by the digital oscilloscope of the amplifier. The sample pool is made of a material with good shielding against electromagnetic noise. The internal structure of the sample pool from top to bottom is platinum mesh electrode, mica sheet, measured sample, and FTO electrode. The transient photovoltage test (TPV) is also an important means of studying the interfacial charge transfer kinetics of the photocatalyst, and its photovoltage response includes two parts: rise and fall. The increase in photovoltage corresponds to an increase in the concentration of electrons on the conductive substrate of the FTO electrode, and this process is caused by the diffusion of photogenerated electrons to the substrate. While the decrease in photovoltage mainly corresponds to the recombination process of electrons leaving the conductive substrate.

### **Section S9. Femtosecond transient absorption measurements.**

Femtosecond transient absorption (fs-TA) measurements were performed on a Helios (Ultrafast systems) spectrometers using a regeneratively amplified femtosecond Ti:sapphire laser system (Spitfire Pro-F1KXP, Spectra-Physics; frequency, 1 kHz; max pulse energy, ~8 mJ; pulse width, 120 fs) at room temperature. Finally, the data were analyzed through commercial software (Surface Explorer, Ultrafast Systems).

### **Section S10. EPR measurement.**

The powdered samples were directly put into the quartz sample tube, placed in the resonator of electron spin resonance spectrometer, and tested after a certain time of light reaction.

### **Section S11. In-situ FTIR analysis**

In-situ Fourier Transform Infrared (FTIR) testing was carried out on Germany Brooke INVENIO S (MCT detector) instrument with an Harrick diffuse reflection in-situ chamber. First, 10 mg sample was loaded into the in-situ infrared cell and then CO<sub>2</sub> and H<sub>2</sub>O vapor were introduced through the CaF<sub>2</sub> window on the device. Prior to measurement, the catalyst was degassed at 150 °C for 30 min. The first subsequent test is recorded as 0 minutes. The reaction was carried out by turning on the lamp for 1 h after absorbing 1 h of CO<sub>2</sub> in the darkness. During the reaction process, infrared spectra were taken at the 1, 2, 4, 8, 10, 15, 20, 30, 50, and 60 minutes, and carbon dioxide flowed continuously without interruption. Compared with visible light irradiation, the peak intensity of \*COOH intermediates produced by the sample under UV irradiation is much higher, indicating a higher catalytic efficiency under UV irradiation, which is consistent with the previous catalytic performance results. In addition, the \*CH<sub>3</sub> and \*CH<sub>2</sub> peaks generated under visible light irradiation are slightly stronger than those generated under UV light irradiation, indicating that the product selectivity of CH<sub>4</sub> under visible light irradiation is higher than that under UV light irradiation, which is consistent with the photocatalytic results.

### **Section S12. Theoretical calculation.**

The plane-wave ultrasoft (PWUS) pseudopotential method, as implemented in the Cambridge Sequential Total Energy Package (CASTEP) algorithm, was used to mimic all geometric optimizations, band structure, and the partial density of states (PDOS), work function, and charge density difference. The absorption spectra were obtained in CASTEP using the Perdew-Wang from 1991 (PW91) functional within the generalized gradient approximation (GGA). Furthermore, on-site Coulomb interactions are included for f orbital of Ho (U = 6 eV) using the GGA+U method. The plane-wave expansion's cutoff energy was set to 700 eV. The Brillouin zone integration was

performed with  $3 \times 4 \times 1$  k-points for geometry optimization. The criteria for convergence in the total energy, force, and displacement convergence threshold are  $1.0 \times 10^{-5}$  eV/atom, 0.05 eV/Å, and 0.005 Å, respectively. Geometry optimization, electronic structure, and optical property calculations were all performed using spin-polarized magnetic computation. The Gibbs free energy change in photocatalytic CO<sub>2</sub> reduction is defined as  $\Delta G = G(\text{final state}) - G(\text{initial state}) = E_{\text{reaction}} + \Delta E_{\text{zero}} - T\Delta S$ , where  $E_{\text{reaction}}$  refers to the reaction energy,  $E_{\text{zero}}$  is zero vibration energy correction,  $\Delta S$  represents the differences in entropy, and the reaction temperature is T.

### **Section S13. The effects of rare earth ions and heterojunctions are different for materials with different compositions and light wavelengths.**

(i) For MTO:Ho/1-CN:Ho, the content of MTO:Ho and CN:Ho is the same, with a mass ratio of 50%. However, for MTO:Ho/9-CN:Ho, the content of MTO in the samples is particularly low, only 10%. It is noted that the effect of Ho single atom on the photocatalytic performance of CN under visible light irradiation is much greater than that under UV light irradiation, as shown in Table S2 and Table S6. For MTO:Ho/9-CN:Ho, the CN:Ho content is particularly high, and Ho single atoms have little effect on the photocatalytic performance of CN under UV irradiation, resulting in no significant improvement in the performance of the MTO:Ho/9-CN:Ho. Therefore, this is a normal phenomenon. (ii) For the “Ho single atoms have little effect on the photocatalytic performance of CN under UV irradiation”: Ho single atoms are not active sites, and active sites are still mainly distributed on the surface of g-C<sub>3</sub>N<sub>4</sub>. Therefore, the main role of Ho in catalyst performance includes the generation of more N vacancies by Ho single atoms and the improvement of light utilization efficiency by 4f energy levels. The phenomenon that the effect of Ho on the performance of CN is more significant in the visible light range than in the UV range may be related to the lower transition probability of  $^5I_8 \rightarrow ^5G_3(^3H_6)$  and  $^5I_8 \rightarrow ^3K_7(^5G_4)$  of Ho<sup>3+</sup> ions in CN:Ho. The specific reasons for this spectroscopic phenomenon are as follows: According to

J-O theory  $A_{JJ'} = \frac{64\pi^4 e^2 \nu^3}{3hc^2} \frac{n(n^2 + 2)^2}{2J + 1 \cdot 9} \sum_{\lambda=2,4,6} \Omega_{\lambda} \langle \Psi_{J'} || U^{(\lambda)} || \Psi_J \rangle^2$ , the  $\Omega_{\lambda}$  values are related to

the local environment around rare earth ions. And thus, the transition probabilities of



$^5I_8 \rightarrow ^5G_3(^3H_6)$  and  $^5I_8 \rightarrow ^3K_7(^5G_4)$  are related to the local environment around  $Ho^{3+}$  ions. Here, due to the relatively weak  $^5I_8 \rightarrow ^5G_3(^3H_6)$  and  $^5I_8 \rightarrow ^3K_7(^5G_4)$  in CN:Ho (Figure S9), Ho cannot effectively improve the UV light utilization of CN, resulting in a less significant performance improvement under UV light irradiation. Therefore, the impact of Ho on CN performance is more significant in the visible range than in the UV. In short, we should acknowledge that the photocatalytic performance of the material still significantly improves after Ho single atom modification. Of course, the extent to which Ho single atoms improve photocatalytic performance depends on many factors such as sample composition and light irradiation wavelength.

**Table S1a.** The comparison of photocatalytic performance with other reported Ti based catalysts.

| Photocatalysts                                                                               | Reaction solution | Light wavelengths         | Production rate ( $\mu\text{mol}\cdot\text{h}^{-1}$ ) |                 | References                                                  |
|----------------------------------------------------------------------------------------------|-------------------|---------------------------|-------------------------------------------------------|-----------------|-------------------------------------------------------------|
|                                                                                              |                   |                           | CO                                                    | CH <sub>4</sub> |                                                             |
| Ag/TiO <sub>2</sub>                                                                          | H <sub>2</sub> O  | $\lambda > 400$ nm        | 18.4                                                  | 46              | <i>Energy Environ. Sci.</i> , 2024, <b>17</b> , 518         |
| Cu/TiO <sub>2</sub>                                                                          | H <sub>2</sub> O  | PLS-SXE300UV<br>Xe lamp   | 15.27                                                 | 0.5             | <i>Angew. Chem. Int. Ed.</i> , 2022, <b>61</b> , e202207600 |
| CsPbBr <sub>3</sub> /Au/TiO <sub>2</sub>                                                     | H <sub>2</sub> O  | Simulate sunlight         | 17.27                                                 | 1.22            | <i>J. Am. Chem. Soc.</i> , 2024, <b>146</b> , 3303          |
| Cs <sub>2</sub> AgBiBr <sub>6</sub> /Ti <sub>3</sub> C <sub>2</sub> T <sub>x</sub>           | H <sub>2</sub> O  | $\lambda > 400$ nm        | 11.2                                                  | 1.30            | <i>Appl. Catal. B-Environ.</i> , 2022, <b>312</b> , 121358  |
| TiO <sub>2</sub> -C <sub>3</sub> N <sub>4</sub> /BiVO <sub>4</sub>                           | H <sub>2</sub> O  | $\lambda > 420$ nm        | 60                                                    | 5.18            | <i>Angew. Chem. Int. Ed.</i> , 2021, <b>60</b> , 20906      |
| SrTiO <sub>3</sub> :Er <sup>3+</sup> /C <sub>3</sub> N <sub>4</sub>                          | MeCN+TEOA         | $\lambda > 420$ nm        | 23.35                                                 | 16.90           | <i>J. Mater. Chem. A</i> , 2021, <b>9</b> , 15820           |
| Mg <sub>1.2</sub> Ti <sub>1.8</sub> O <sub>5</sub> :Ho<br>/C <sub>3</sub> N <sub>4</sub> :Ho | H <sub>2</sub> O  | $\lambda > 420$ nm        | 59.77                                                 | 9.21            | This work                                                   |
|                                                                                              | H <sub>2</sub> O  | 320nm> $\lambda > 400$ nm | 100.41                                                | 12.60           |                                                             |

**Table S1b.** The comparison of photocatalytic performance with other RE single atom materials.

| Photocatalysts                                                                               | Reaction solution                      | Light wavelengths         | Production rate ( $\mu\text{mol}\cdot\text{h}^{-1}$ ) |                 | References                                             |
|----------------------------------------------------------------------------------------------|----------------------------------------|---------------------------|-------------------------------------------------------|-----------------|--------------------------------------------------------|
|                                                                                              |                                        |                           | CO                                                    | CH <sub>4</sub> |                                                        |
| Er/C <sub>3</sub> N <sub>4</sub>                                                             | H <sub>2</sub> O                       | $\lambda > 420$ nm        | 47.1                                                  | 2.5             | <i>Angew. Chem. Int. Ed.</i> , 2020, <b>59</b> , 10651 |
| BPEr/SNOEr-10                                                                                | H <sub>2</sub> O                       | $\lambda > 420$ nm        | 19.01                                                 | 8.89            | <i>Chem. Sci.</i> , 2024, <b>15</b> , 1860             |
| O/La-C <sub>3</sub> N <sub>4</sub>                                                           | Acetonitrile<br>+TEOA+H <sub>2</sub> O | Simulate sunlight         | 92                                                    | 5.6             | <i>ACS Nano</i> , 2020, <b>14</b> , 15841              |
| Mg <sub>1.2</sub> Ti <sub>1.8</sub> O <sub>5</sub> :Ho<br>/C <sub>3</sub> N <sub>4</sub> :Ho | H <sub>2</sub> O                       | $\lambda > 420$ nm        | 59.77                                                 | 9.21            | This work                                              |
|                                                                                              | H <sub>2</sub> O                       | 320nm> $\lambda > 400$ nm | 100.41                                                | 12.60           |                                                        |

**Table S2.** Control experiments to prepare the unexfoliated g-C<sub>3</sub>N<sub>4</sub> (g-CN), ultra-thin g-C<sub>3</sub>N<sub>4</sub> (CN) nanosheets, Ho single atom anchored ultra-thin g-C<sub>3</sub>N<sub>4</sub> (CN:Ho) nanosheets, and their catalytic performance under visible light irradiation.

| Samples             | Urea     | Ho(NO <sub>3</sub> ) <sub>3</sub> | Production rate (μmol h <sup>-1</sup> g <sup>-1</sup> ) |                 |
|---------------------|----------|-----------------------------------|---------------------------------------------------------|-----------------|
|                     |          |                                   | CO                                                      | CH <sub>4</sub> |
| g-CN (unexfoliated) | 0.05 mol | 0                                 | 3.25                                                    | 2.06            |
| CN (ultrathin)      | 0.05 mol | 0                                 | 9.06                                                    | 3.17            |
| CN:0.1%Ho           | 0.05 mol | 0.05 mmol                         | 21.03                                                   | 2.55            |
| CN:0.2%Ho           | 0.05 mol | 0.10 mmol                         | 23.75                                                   | 3.43            |
| CN:0.3%Ho           | 0.05 mol | 0.15 mmol                         | 25.45                                                   | 3.75            |
| CN:0.4%Ho           | 0.05 mol | 0.20 mmol                         | 22.46                                                   | 3.45            |
| CN:0.5%Ho           | 0.05 mol | 0.25 mmol                         | 19.21                                                   | 3.22            |
| CN:0.6%Ho           | 0.05 mol | 0.30 mmol                         | 17.86                                                   | 3.17            |
| CN:0.7%Ho           | 0.05 mol | 0.35 mmol                         | 16.81                                                   | 2.77            |
| CN:0.8%Ho           | 0.05 mol | 0.40 mmol                         | 15.47                                                   | 2.53            |
| CN:0.9%Ho           | 0.05 mol | 0.45 mmol                         | 14.12                                                   | 2.29            |
| CN:1%Ho             | 0.05 mol | 0.50 mmol                         | 13.08                                                   | 2.15            |

**Table S3.** Control experiments to prepare the Mg<sub>1.2</sub>Ti<sub>1.8</sub>O<sub>5</sub> and Ho single atom anchored Mg<sub>1.2</sub>Ti<sub>1.8</sub>O<sub>5</sub>, and catalytic performance under ultraviolet light irradiation.

| Samples    | Mg(CH <sub>3</sub> COO) <sub>2</sub> | Ti(OC <sub>4</sub> H <sub>9</sub> ) <sub>4</sub> | Ho(NO <sub>3</sub> ) <sub>3</sub> | Production rate (μmol h <sup>-1</sup> g <sup>-1</sup> ) |                 |
|------------|--------------------------------------|--------------------------------------------------|-----------------------------------|---------------------------------------------------------|-----------------|
|            |                                      |                                                  |                                   | CO                                                      | CH <sub>4</sub> |
| MTO        | 0.001250 mol                         | 950 μL                                           | 0                                 | 48.03                                                   | 7.25            |
| MTO:0.1%Ho | 0.001249 mol                         | 950 μL                                           | 0.00125 mmol                      | 50.32                                                   | 7.56            |
| MTO:0.2%Ho | 0.001248 mol                         | 950 μL                                           | 0.0025 mmol                       | 52.88                                                   | 8.29            |
| MTO:0.3%Ho | 0.001247 mol                         | 950 μL                                           | 0.00375 mmol                      | 60.51                                                   | 9.98            |
| MTO:0.4%Ho | 0.001245 mol                         | 950 μL                                           | 0.005 mmol                        | 67.87                                                   | 11.65           |
| MTO:0.5%Ho | 0.001244 mol                         | 950 μL                                           | 0.00625 mmol                      | 75.69                                                   | 13.21           |
| MTO:0.6%Ho | 0.001243 mol                         | 950 μL                                           | 0.0075 mmol                       | 80.11                                                   | 15.80           |
| MTO:0.7%Ho | 0.001242 mol                         | 950 μL                                           | 0.00875 mmol                      | 80.68                                                   | 15.92           |
| MTO:0.8%Ho | 0.001240 mol                         | 950 μL                                           | 0.0100 mmol                       | 81.53                                                   | 15.95           |
| MTO:0.9%Ho | 0.001239 mol                         | 950 μL                                           | 0.01125 mmol                      | 75.68                                                   | 17.05           |
| MTO:1%Ho   | 0.001238 mol                         | 950 μL                                           | 0.0125 mmol                       | 70.32                                                   | 18.03           |

**Table S4.** The catalytic performance of different samples under simulated sunlight

irradiation ( $320 < \lambda < 780$  nm).

| Samples        | Production rate ( $\mu\text{mol h}^{-1}\text{g}^{-1}$ ) |                 |
|----------------|---------------------------------------------------------|-----------------|
|                | CO                                                      | CH <sub>4</sub> |
| CN (ultrathin) | 42.62                                                   | 3.68            |
| CN:0.3%Ho      | 54.37                                                   | 4.27            |
| MTO            | 60.03                                                   | 8.15            |
| MTO:Ho         | 91.86                                                   | 14.35           |
| MTO/9-CN       | 100.37                                                  | 8.36            |
| MTO:Ho/9-CN:Ho | 141.74                                                  | 17.07           |

**Table S5.** Control experiments to prepare the Ho single atom modified  $\text{Mg}_{1.2}\text{Ti}_{1.8}\text{O}_5/\text{C}_3\text{N}_4$  by the chemisorption method, and catalytic performance under visible light irradiation. Here, the g- $\text{C}_3\text{N}_4$  contents in  $\text{Mg}_{1.2}\text{Ti}_{1.8}\text{O}_5/\text{g-C}_3\text{N}_4$  composites are consistent with the initial feeding ratio, which has been proven through elemental analysis.

| Samples         | MTO:0.8%<br>Ho | CN:0.3%<br>Ho | MTO    | CN     | MTO:Ho/CN:Ho<br>(or MTO/CN )<br>mass ratios | Production rate<br>( $\mu\text{mol h}^{-1}\text{g}^{-1}$ ) |                 |
|-----------------|----------------|---------------|--------|--------|---------------------------------------------|------------------------------------------------------------|-----------------|
|                 |                |               |        |        |                                             | CO                                                         | CH <sub>4</sub> |
| MTO:Ho/1-CN:Ho  | 0.05 g         | 0.05 g        | 0      | 0      | 1:1                                         | 42.9                                                       | 6.34            |
| MTO:Ho/3-CN:Ho  | 0.05 g         | 0.15 g        | 0      | 0      | 1:3                                         | 45.38                                                      | 7.14            |
| MTO:Ho/5-CN:Ho  | 0.05 g         | 0.25 g        | 0      | 0      | 1:5                                         | 46.87                                                      | 7.61            |
| MTO:Ho/7-CN:Ho  | 0.05 g         | 0.35 g        | 0      | 0      | 1:7                                         | 50.53                                                      | 8.62            |
| MTO:Ho/9-CN:Ho  | 0.05 g         | 0.45 g        | 0      | 0      | 1:9                                         | 59.77                                                      | 9.21            |
| MTO:Ho/12-CN:Ho | 0.05 g         | 0.6 g         | 0      | 0      | 1:12                                        | 45.51                                                      | 6.23            |
| MTO/9-CN        | 0              | 0             | 0.05 g | 0.45 g | 1:9                                         | 42.15                                                      | 4.07            |

**Table S6.** Control experiments to prepare the Ho single atom modified CN, MTO, and  $\text{Mg}_{1.2}\text{Ti}_{1.8}\text{O}_5/\text{C}_3\text{N}_4$  synthesized by the chemisorption method, and catalytic performance under ultraviolet light irradiation.

| Samples   | MTO:0.8<br>%Ho | CN:0.3%Ho | MTO | CN     | Production rate<br>( $\mu\text{mol h}^{-1}\text{g}^{-1}$ ) |                 |
|-----------|----------------|-----------|-----|--------|------------------------------------------------------------|-----------------|
|           |                |           |     |        | CO                                                         | CH <sub>4</sub> |
| g-CN      | 0              | 0         | 0   | 0.01 g | 9.66                                                       | 2.13            |
| CN        | 0              | 0         | 0   | 0.01 g | 33.97                                                      | 3.59            |
| CN:0.3%Ho | 0              | 0.01 g    | 0   | 0      | 36.42                                                      | 2.54            |

|                |        |        |        |        |        |       |
|----------------|--------|--------|--------|--------|--------|-------|
| MTO            | 0      | 0      | 0.01 g | 0      | 48.03  | 7.25  |
| MTO:0.8%Ho     | 0.01 g | 0      | 0      | 0      | 81.53  | 15.95 |
| 5-MTO:Ho/CN:Ho | 0.25 g | 0.05 g | 0      | 0      | 75.53  | 10.64 |
| 2-MTO:Ho/CN:Ho | 0.1 g  | 0.05 g | 0      | 0      | 82.22  | 11.25 |
| MTO:Ho/1-CN:Ho | 0.05 g | 0.05 g | 0      | 0      | 100.41 | 12.6  |
| MTO:Ho/3-CN:Ho | 0.05 g | 0.15 g | 0      | 0      | 49.60  | 5.22  |
| MTO:Ho/5-CN:Ho | 0.05 g | 0.25 g | 0      | 0      | 44.78  | 4.43  |
| MTO:Ho/7-CN:Ho | 0.05 g | 0.35 g | 0      | 0      | 41.60  | 3.96  |
| MTO:Ho/9-CN:Ho | 0.05 g | 0.45 g | 0      | 0      | 35.94  | 3.25  |
| MTO/1-CN       | 0      | 0      | 0.05 g | 0.05 g | 50.04  | 6.42  |
| MTO/9-CN       | 0      | 0      | 0.05 g | 0.45 g | 32.23  | 2.52  |

**Table S7.** EXAFS fitting parameters at the Ho  $L_3$ -edge for various samples.

| Samples                        | Shell | $CN^a$  | $R(\text{\AA})^b$ | $\sigma^2(\text{\AA}^2)^c$ | $\Delta E_0(\text{eV})^d$ | $R$ factor |
|--------------------------------|-------|---------|-------------------|----------------------------|---------------------------|------------|
| Ho <sub>2</sub> O <sub>3</sub> | Ho-O  | 6*      | 2.287±0.001       | 0.0074±0.0013              | 1.7±0.4                   | 0.0165     |
|                                | Ho-O  | 2*      | 3.194±0.001       | 0.0048±0.0006              | -3.2±0.6                  |            |
|                                | Ho-Ho | 6*      | 3.522±0.001       |                            |                           |            |
|                                | Ho-Ho | 6*      | 4.074±0.001       | 0.0067±0.0011              | 6.0±1.1                   |            |
| MTO:Ho/<br>9-CN:Ho             | Ho-O  | 8.6±0.6 | 2.356±0.001       | 0.0144±0.0011              | -2.4±0.1                  | 0.0091     |
|                                | Ho-N  | 2.8±0.7 | 2.445±0.001       |                            |                           |            |

<sup>a</sup> $CN$ , coordination number; <sup>b</sup> $R$ , the distance to the neighboring atom; <sup>c</sup> $\sigma^2$ , the Mean Square Relative Displacement (MSRD); <sup>d</sup> $\Delta E_0$ , inner potential correction;  $R$  factor indicates the goodness of the fit.  $S_0^2$  was fixed to 0.795, according to the experimental EXAFS fit of Ho<sub>2</sub>O<sub>3</sub> by fixing  $CN$  as the known crystallographic value. \* This value was fixed during EXAFS fitting, based on the known structure of Ho<sub>2</sub>O<sub>3</sub>. Fitting range:  $3.0 \leq k (\text{\AA}^{-1}) \leq 12.0$  and  $1.1 \leq R (\text{\AA}) \leq 4.2$  (2-Ho);  $2.0 \leq k (\text{\AA}^{-1}) \leq 12.0$  and  $1.0 \leq R (\text{\AA}) \leq 2.7$  (1-Ho). A reasonable range of EXAFS fitting parameters:  $0.700 < S_0^2 < 1.000$ ;  $CN > 0$ ;  $\sigma^2 > 0 \text{\AA}^2$ ;  $|\Delta E_0| < 15 \text{ eV}$ ;  $R \text{ factor} < 0.02$ .

**Table S8.** The content ratio of Mg and Ti elements in MTO by ICP testing.

| Elements | Mass content | Molar content |
|----------|--------------|---------------|
| Mg       | 14.620%      | 0.147%        |
| Ti       | 44.211%      | 0.225%        |

**Table S9.** The effect of different rare earth ions on the photocatalytic performance of g-C<sub>3</sub>N<sub>4</sub> under visible light irradiation. To demonstrate that the effects of different

rare earth ion energy levels on the performance of photocatalysts are different, the most representative elements, including Yttrium (Y), Gadolinium (Gd), Europium (Eu), and Holmium (Ho), were selected as the control group for the experiment for testing. The results indicated that the photocatalytic performance of g-C<sub>3</sub>N<sub>4</sub>:Eu<sup>3+</sup> and g-C<sub>3</sub>N<sub>4</sub>:Ho<sup>3+</sup> is better than that of g-C<sub>3</sub>N<sub>4</sub>:Gd<sup>3+</sup> and g-C<sub>3</sub>N<sub>4</sub>:Y<sup>3+</sup>, and g-C<sub>3</sub>N<sub>4</sub>:Ho<sup>3+</sup> has the best photocatalytic properties.

| Photocatalysts                                        | Main products and rates ( $\mu\text{mol g}^{-1} \text{h}^{-1}$ ) |                 | Efficiency ratio of g-C <sub>3</sub> N <sub>4</sub> :Ln <sup>3+</sup> (Ln = Y, Gd, Eu, Ho) and g-C <sub>3</sub> N <sub>4</sub> |
|-------------------------------------------------------|------------------------------------------------------------------|-----------------|--------------------------------------------------------------------------------------------------------------------------------|
|                                                       | CO                                                               | CH <sub>4</sub> |                                                                                                                                |
| g-C <sub>3</sub> N <sub>4</sub>                       | 9.06                                                             | 3.17            | 1.00                                                                                                                           |
| g-C <sub>3</sub> N <sub>4</sub> :0.3%Y <sup>3+</sup>  | 15.05                                                            | 2.41            | 1.14                                                                                                                           |
| g-C <sub>3</sub> N <sub>4</sub> :0.3%Gd <sup>3+</sup> | 15.86                                                            | 2.63            | 1.21                                                                                                                           |
| g-C <sub>3</sub> N <sub>4</sub> :0.3%Eu <sup>3+</sup> | 18.25                                                            | 2.54            | 1.31                                                                                                                           |
| g-C <sub>3</sub> N <sub>4</sub> :0.3%Ho <sup>3+</sup> | 25.45                                                            | 3.75            | 1.86                                                                                                                           |

**Table S10.** The integrated area of the maximum photogenic charge extraction efficiency (corresponding to Figure 4f).

| Samples        | Max height (absolute value) | Max time (ns*10 <sup>5</sup> ) | Area (absolute value) |
|----------------|-----------------------------|--------------------------------|-----------------------|
| CN             | 1.487                       | 7638                           | 11215                 |
| CN:Ho          | 1.870                       | 2826                           | 13517                 |
| MTO            | 1.262                       | 21540                          | 12572                 |
| MTO:Ho         | 4.097                       | 75858                          | 383078                |
| MTO:Ho/9-CN:Ho | 12.745                      | 6054                           | 256685                |

**Table S11.** The adsorption energies ( $E_{\text{adv}}$ ), C=O bond lengths, and O=C=O bond angles of CO<sub>2</sub> on the surface of g-C<sub>3</sub>N<sub>4</sub> and g-C<sub>3</sub>N<sub>4</sub>:Ho with different configurations and different adsorption positions. Here, different g-C<sub>3</sub>N<sub>4</sub> and g-C<sub>3</sub>N<sub>4</sub>:Ho configurations correspond to the configurations in Figure S35-S37.

| Samples                                             | Site-1                                                                                     | Site-2                                                                                     |
|-----------------------------------------------------|--------------------------------------------------------------------------------------------|--------------------------------------------------------------------------------------------|
| g-C <sub>3</sub> N <sub>4</sub> (I)-CO <sub>2</sub> | $E_{\text{adv}}$ : -0.07 eV; C=O bond length: 1.178 Å, 1.181 Å; O=C=O bond angle: 178.542° | $E_{\text{adv}}$ : -0.01 eV; C=O bond length: 1.180 Å, 1.180 Å; O=C=O bond angle: 179.119° |

|                                                                  |                                                                                                                                                                              |                                                                                                                                                                               |
|------------------------------------------------------------------|------------------------------------------------------------------------------------------------------------------------------------------------------------------------------|-------------------------------------------------------------------------------------------------------------------------------------------------------------------------------|
| $g\text{-C}_3\text{N}_4(\text{I})\text{-2CO}_2$                  | Total $E_{\text{adv}}$ for two $\text{CO}_2$ molecules: -0.13 eV; For the $\text{CO}_2$ molecule on the left: C=O bond length: 0.974 Å, 1.181 Å; O=C=O bond angle: 178.824 ° | Total $E_{\text{adv}}$ for two $\text{CO}_2$ molecules: -0.13 eV; For the $\text{CO}_2$ molecule on the right: C=O bond length: 1.178 Å, 1.181 Å; O=C=O bond angle: 178.796 ° |
| $g\text{-C}_3\text{N}_4\text{:Ho}(\text{I})\text{-CO}_2$         | $E_{\text{adv}}$ : -0.59 eV; C=O bond length: 1.221 Å, 1.256 Å; O=C=O bond angle: 141.725 °                                                                                  | —                                                                                                                                                                             |
| $g\text{-C}_3\text{N}_4(\text{II})\text{-CO}_2$                  | $E_{\text{adv}}$ : -0.06 eV; C=O bond length: 1.181 Å, 1.179 Å; O=C=O bond angle: 178.923 °                                                                                  | $E_{\text{adv}}$ : -0.05 eV; C=O bond length: 1.181 Å, 1.179 Å; O=C=O bond angle: 179.019 °                                                                                   |
| $g\text{-C}_3\text{N}_4\text{:Ho}(\text{II})\text{-CO}_2$        | $E_{\text{adv}}$ : -0.08 eV; C=O bond length: 1.180 Å, 1.179 Å; O=C=O bond angle: 178.527 °                                                                                  | —                                                                                                                                                                             |
| $\text{Mg}_{1.2}\text{Ti}_{1.8}\text{O}_5\text{-CO}_2$           | $E_{\text{adv}}$ : -0.12 eV; C=O bond length: 1.179 Å, 1.179 Å; O=C=O bond angle: 177.627 °                                                                                  | —                                                                                                                                                                             |
| $\text{Mg}_{1.2}\text{Ti}_{1.8}\text{O}_5\text{:Ho}\text{-CO}_2$ | $E_{\text{adv}}$ : -0.15 eV; C=O bond length: 1.190 Å, 1.171 Å; O=C=O bond angle: 170.141 °                                                                                  | —                                                                                                                                                                             |

**Table S12.** Attribution of infrared peaks at different positions.

| Positions of infrared peaks | Attribution of infrared peaks | References                                                           |
|-----------------------------|-------------------------------|----------------------------------------------------------------------|
| 3754~3400 $\text{cm}^{-1}$  | * $\text{H}_2\text{O}$        | <i>Chem. Rev.</i> , <b>2019</b> , <i>119</i> , 3962.                 |
| 2170~2420 $\text{cm}^{-1}$  | * $\text{CO}_2$               | <i>Chem. Rev.</i> , <b>2019</b> , <i>119</i> , 3962.                 |
| 1540~1770 $\text{cm}^{-1}$  | *COOH                         | <i>Chem. Rev.</i> , <b>2019</b> , <i>119</i> , 3962.                 |
| 1026~1079 $\text{cm}^{-1}$  | *CHO                          | <i>Angew. Chem. Int. Ed.</i> , <b>2023</b> , <i>62</i> , e202213124. |
| 1120~1209 $\text{cm}^{-1}$  | * $\text{CH}_3\text{O}$       | <i>Angew. Chem. Int. Ed.</i> , <b>2023</b> , <i>62</i> , e202213124. |
| 1315~1495 $\text{cm}^{-1}$  | * $\text{CO}_3^{2-}$          | <i>Chem. Eng. J.</i> , <b>2023</b> , <i>452</i> , 139378.            |
| ~2074                       | *CO                           | <i>Nat. Catal.</i> , <b>2021</b> , <i>4</i> , 719.                   |

|                            |                  |                                                                |
|----------------------------|------------------|----------------------------------------------------------------|
| 2934~2950 $\text{cm}^{-1}$ | *CH <sub>3</sub> | <i>Adv. Funct. Mater.</i> , <b>2024</b> , <i>34</i> , 2308411. |
| 2875~2920 $\text{cm}^{-1}$ | *CH <sub>2</sub> | <i>Adv. Funct. Mater.</i> , <b>2024</b> , <i>34</i> , 2308411. |

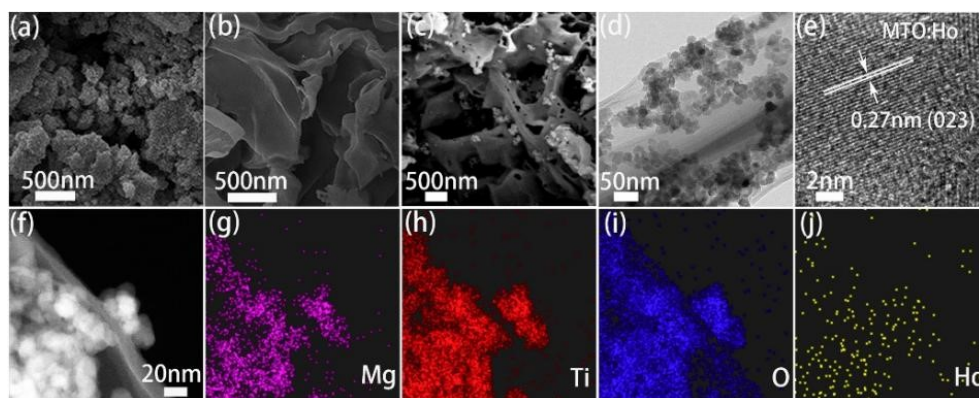

**Figure S1.** SEM images of (a) MTO, (b) CN, and (c) MTO:Ho/9-CN:Ho. (d-j) TEM, HRTEM, and EDX elemental mappings of MTO:Ho.

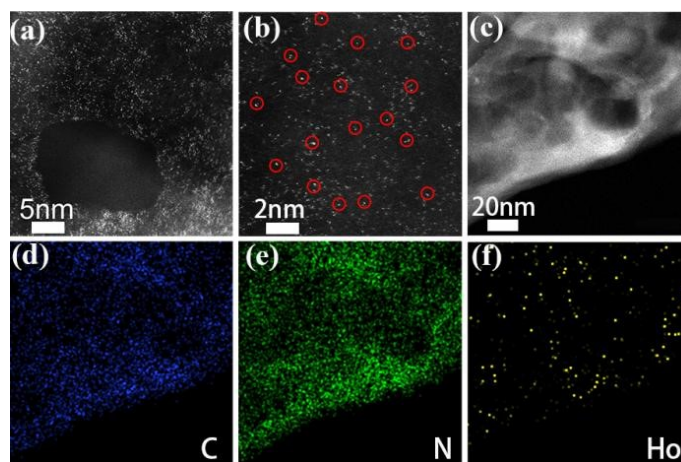

**Figure S2.** (a,b) AC HAADF-STEM images and (c-f) EDX elemental mappings of CN:Ho.



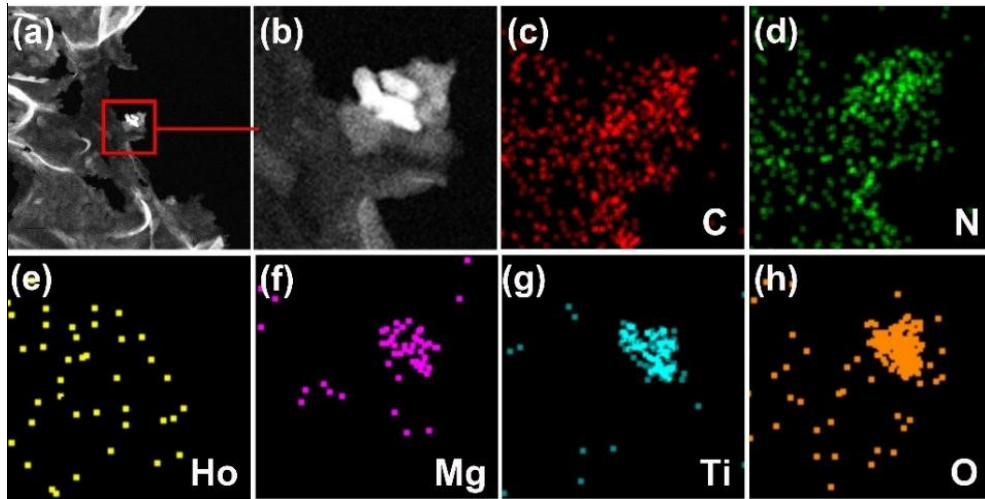

**Figure S3.** (a) TEM images and (b-h) EDX elemental mappings of MTO:Ho/9-CN:Ho.

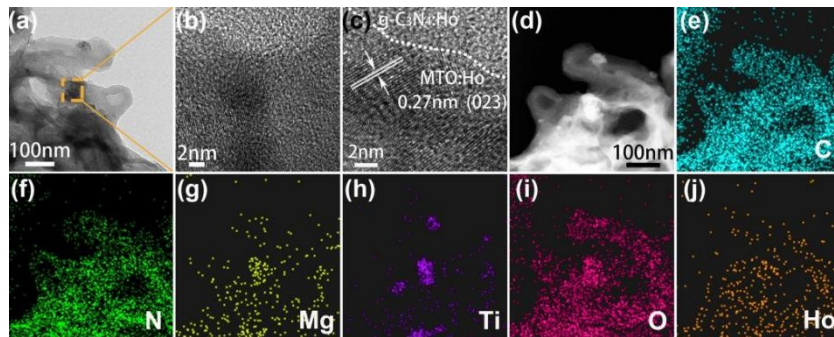

**Figure S4.** (a-c) TEM and HRTEM images of MTO:Ho/9-g-CN:Ho. (d-j) EDX elemental mappings of MTO:Ho/9-g-CN:Ho. Here, the g-CN:Ho inside MTO:Ho/9-g-CN:Ho was unexfoliated.

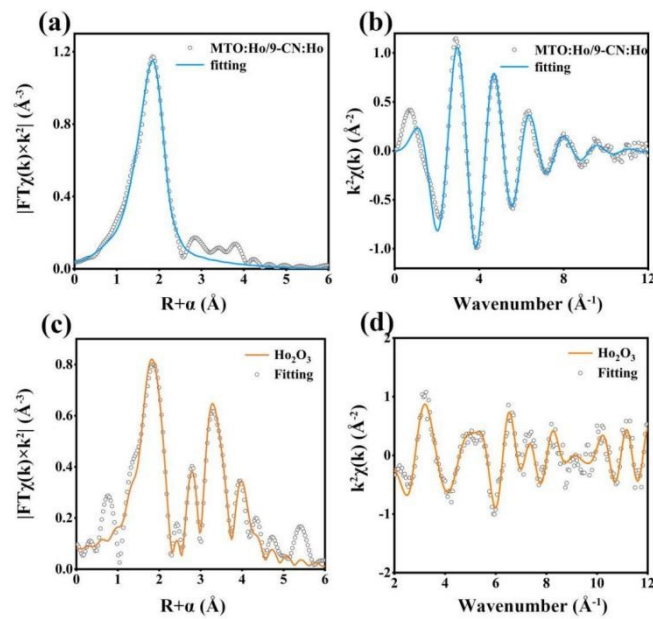

**Figure S5.** The corresponding EXAFS *R*-space fitting curves and EXAFS *k* space fitting curves of (a,b) MTO:Ho/9-CN:Ho and (c,d) Ho<sub>2</sub>O<sub>3</sub> sample.

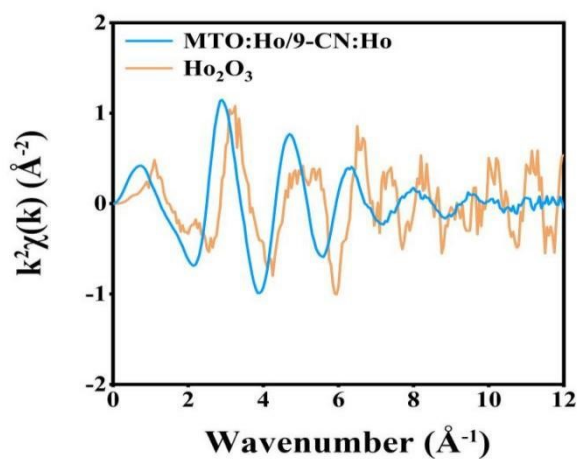

**Figure S6.** Comparison of the corresponding EXAFS k space fitting curves of MTO:Ho/9-CN:Ho and  $\text{Ho}_2\text{O}_3$ .

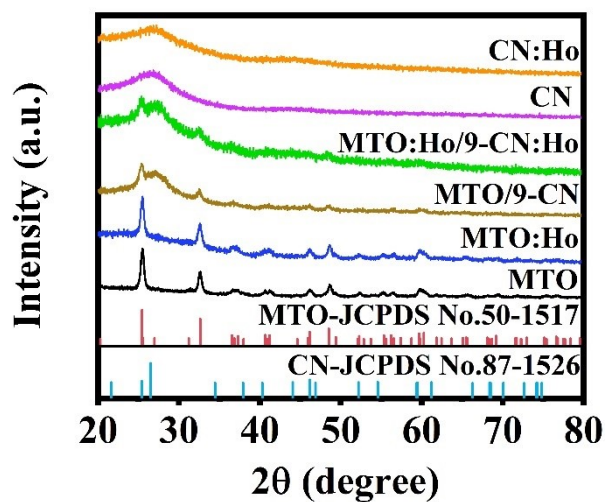

**Figure S7.** The XRD patterns of different samples.

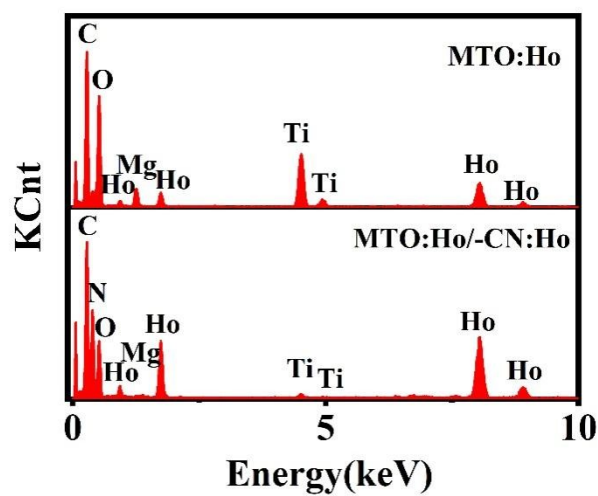

**Figure S8.** EDS images of MTO:Ho and MTO:Ho/9-CN:Ho.

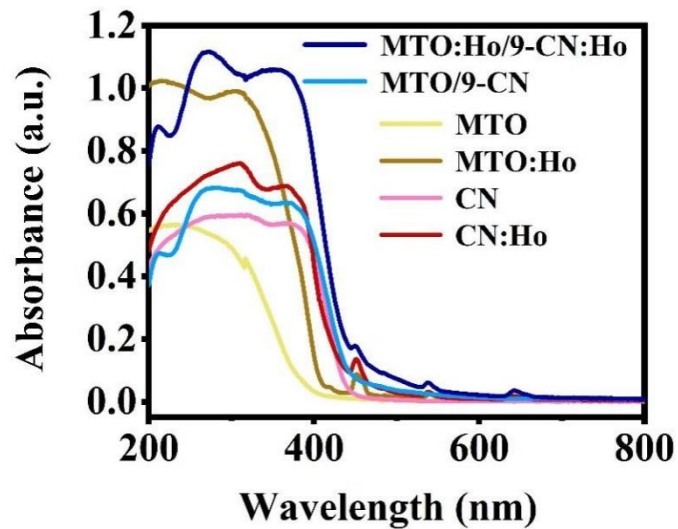

Figure S9. UV-Vis absorption spectra of the different samples.

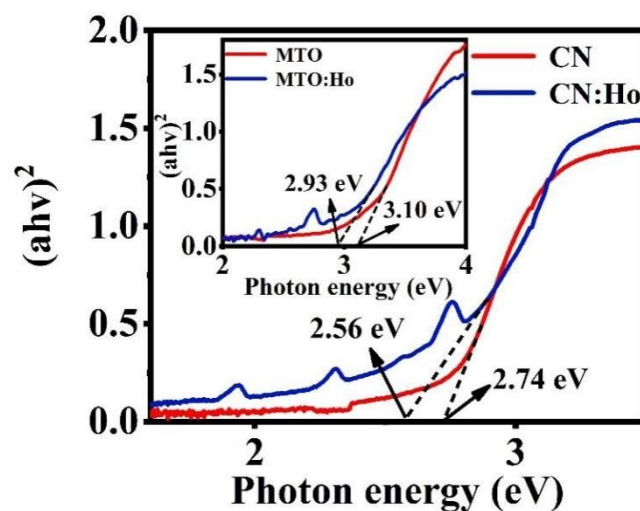

Figure S10. The plots of  $(ah\nu)^2$  versus photon energy.

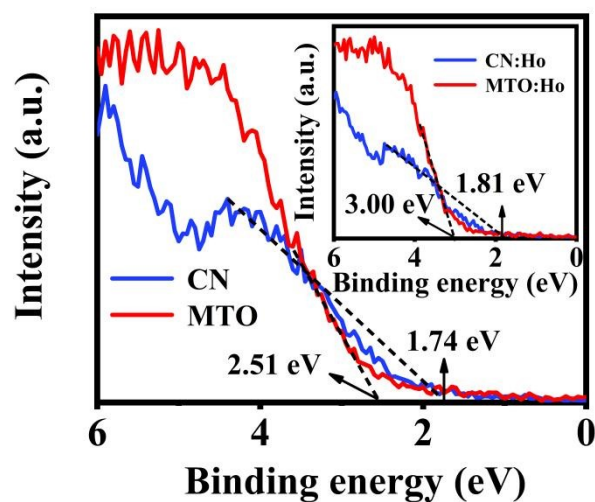

**Figure S11.** XPS valence band spectra of different samples.

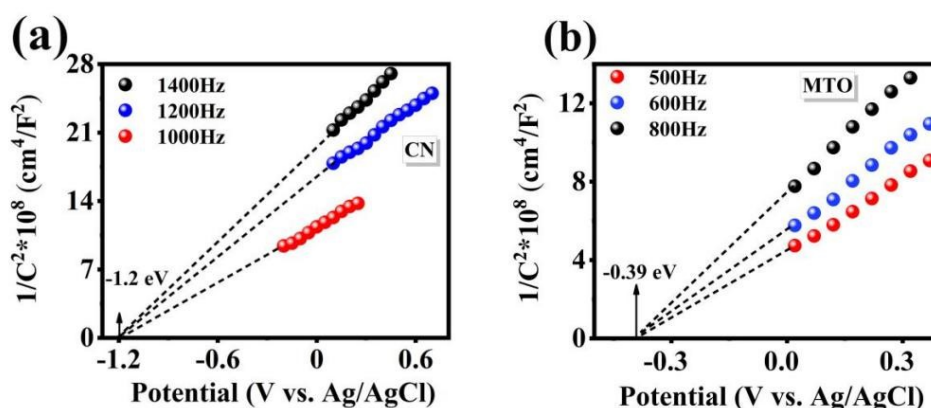

**Figure S12.** Mott-Schottky plots of (a) CN and (b) MTO.

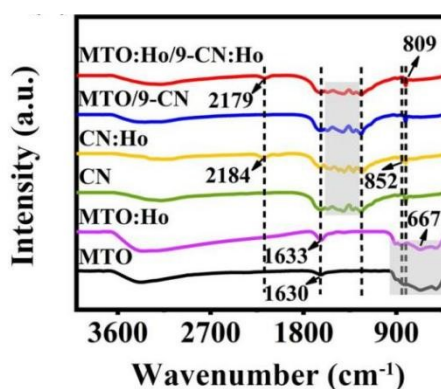

**Figure S13.** FT-IR spectra of different samples. The peak at  $\sim 809\text{ cm}^{-1}$  belongs to the bending vibration of the heptazine heterocyclic ring, and the peak at  $1200\text{ cm}^{-1}$ - $1650\text{ cm}^{-1}$  belongs to the N-C=N bond and various vibrations of the C-N bond. The new peak at  $\sim 2184\text{ cm}^{-1}$  in CN:Ho is related to the telescopic vibration of C $\equiv$ N. In the spectrum of MTO, the peak at  $\sim 500\text{ cm}^{-1}$  belongs to the stretching vibration of Mg-O bond, the peak at  $600\text{ cm}^{-1}$ - $750\text{ cm}^{-1}$  comes from Ti-O bond, and the peak at  $3400\text{ cm}^{-1}$  belongs to the OH vibration of surface water molecules. The characteristic vibration peaks of CN and MTO are observed in the spectra of composite materials.

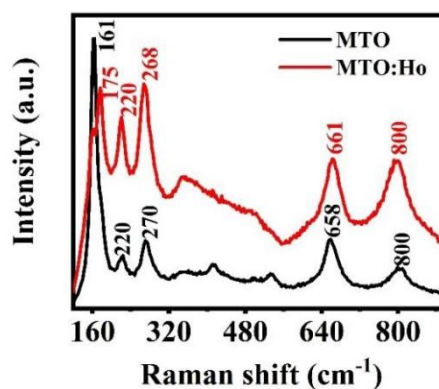

**Figure S14.** Raman spectra of MTO and MTO:Ho. The peaks at 658 and 800  $\text{cm}^{-1}$  are the vibrations of the O atom, and the peaks at 161, 220, and 268  $\text{cm}^{-1}$  are attributed to the antisymmetric respiratory vibrations and torsional vibrations of the O octahedron.

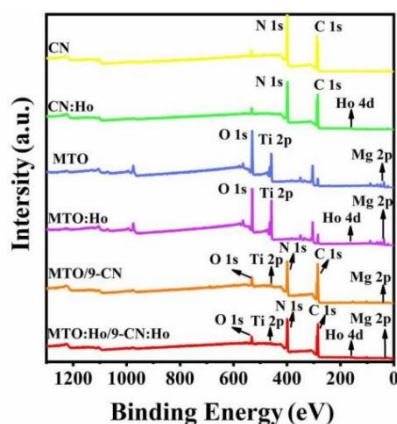

**Figure S15.** XPS fully scanned spectra of different samples, which can clearly show the elements of each sample, further proving the successful combination of the two materials.

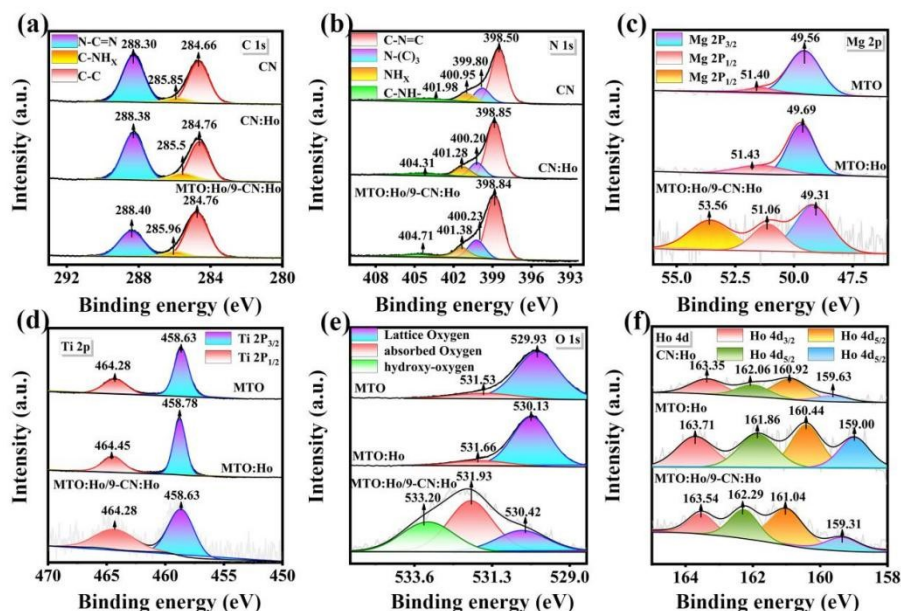

**Figure S16.** XPS spectra of CN, CN:Ho, MTO, MTO:Ho, and MTO:Ho/9-CN:Ho: (a) C 1s, (b) N 1s, (c) Mg 2p, (d) Ti 2p, (e) O 1s, and (f) Ho 4d.

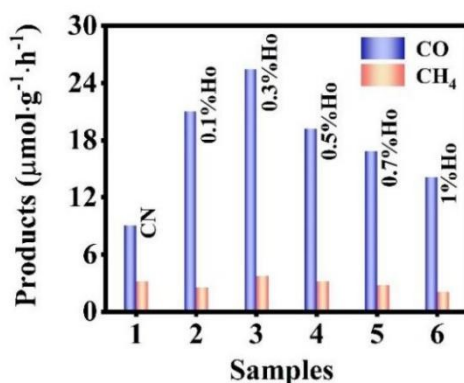

**Figure S17.** Photocatalytic properties of CN and CN:Ho with different Ho contents under visible light irradiation.

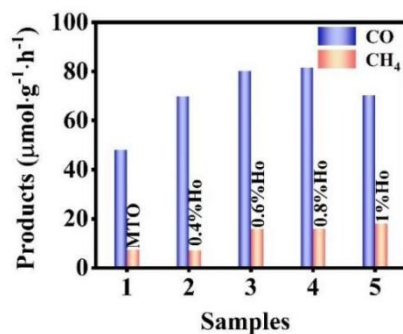

**Figure S18.** Photocatalytic properties of MTO and MTO:Ho with different Ho contents under ultraviolet light irradiation.

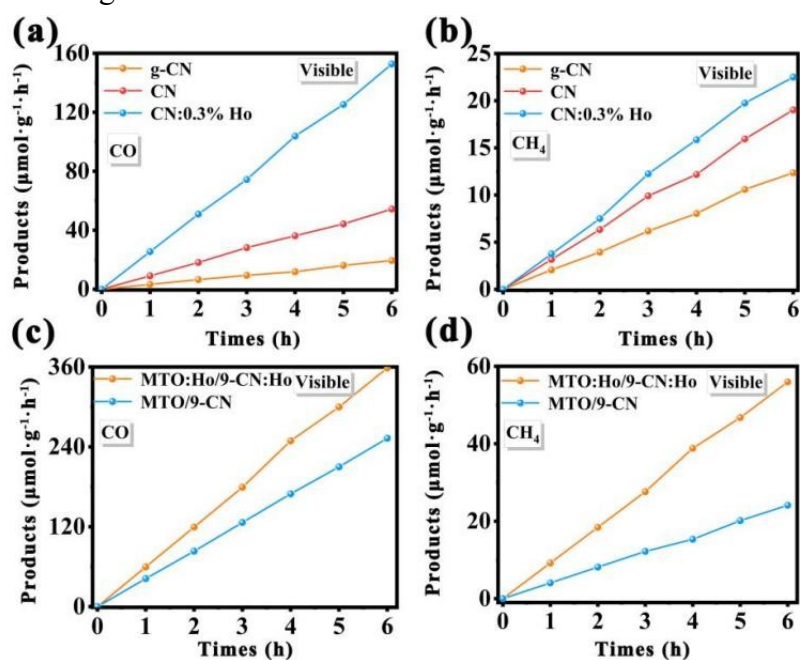

**Figure S19.** The evolution rates of CO and CH<sub>4</sub> during the photocatalytic CO<sub>2</sub> reduction for the g-C<sub>3</sub>N<sub>4</sub>, CN, CN:Ho, MTO/9-CN, and MTO:Ho/9-CN:Ho catalysts under visible light irradiation.

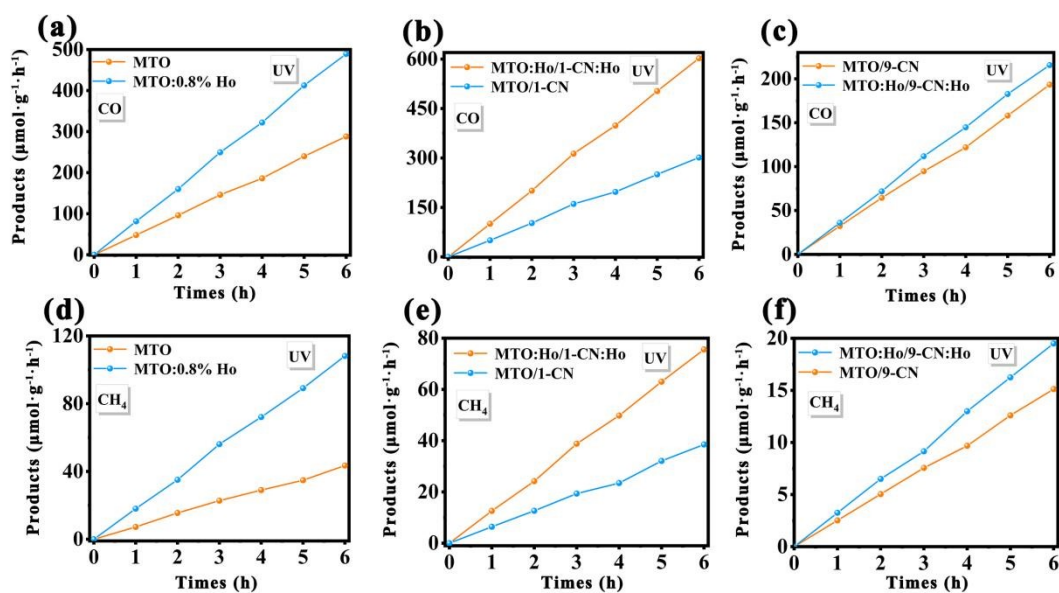

**Figure S20.** The evolution rates of CO and CH<sub>4</sub> during the photocatalytic CO<sub>2</sub> reduction of the MTO, MTO:Ho, MTO/1-CN, MTO:Ho/1-CN:Ho, MTO/9-CN, and MTO:Ho/9-CN:Ho catalysts under UV light irradiation.

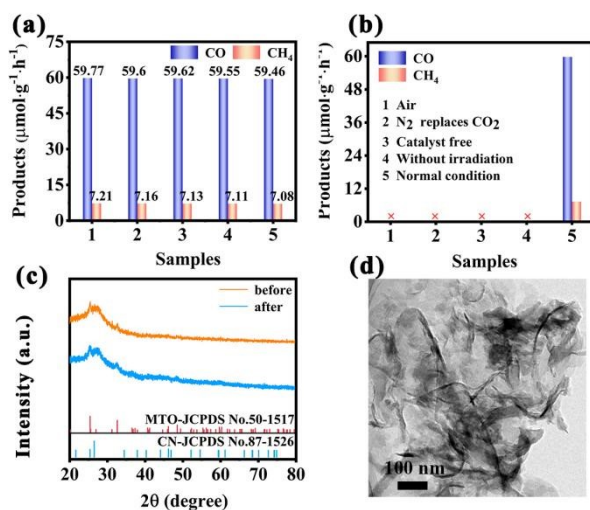

**Figure S21.** (a) Performance stability of MTO:Ho/9-CN:Ho under visible light irradiation. (b) Performance comparison under different experimental conditions: (1) The content of CO and CH<sub>4</sub> was almost zero when CO<sub>2</sub> was replaced by air for photocatalytic reactions; (2) The yields of CO and CH<sub>4</sub> are zero when CO<sub>2</sub> was replaced by N<sub>2</sub> for photocatalytic reactions; (3) The yields of CO and CH<sub>4</sub> are also zero when there is no catalyst in the catalytic reaction, indicating that the reactor itself cannot decompose CO and CH<sub>4</sub>; (4) The yields of CO and CH<sub>4</sub> are zero when there is no light irradiation; (5) For better comparison, the photocatalytic yields of CO and CH<sub>4</sub> for MTO:Ho/9-CN:Ho under normal photocatalytic conditions (corresponding to Figure 2a) are also shown. (c) Comparison of XRD of MTO:Ho/9-CN:Ho before and after photocatalytic reaction. (d) The TEM image of MTO:Ho/9-CN:Ho after photocatalytic reaction, the TEM images of MTO:Ho/9-CN:Ho before photocatalytic reaction are shown in Figure S3.

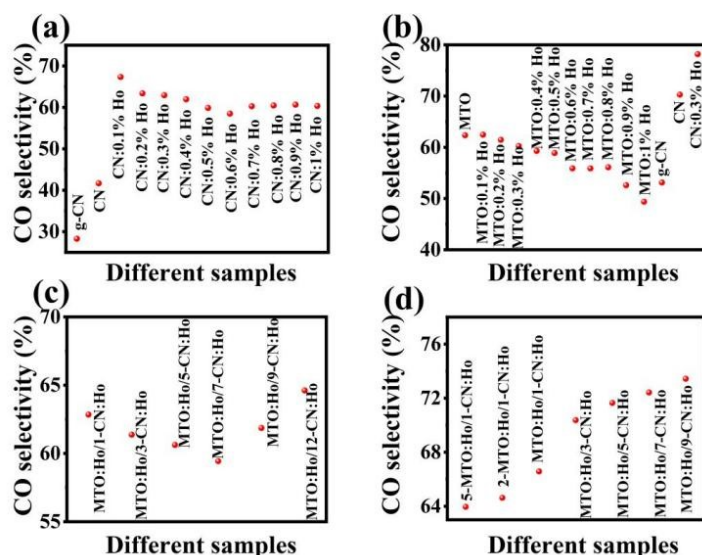

**Figure S22.** CO product selectivity of different photocatalysts: (a) g-CN, CN, and CN:Ho under visible light irradiation, (b) MTO, MTO:Ho, g-CN, CN, and CN:Ho under UV light irradiation, (c) different composites under visible light irradiation, and (d) UV light irradiation.

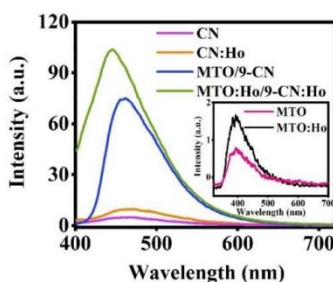

**Figure S23.** The spectra of hydroxyl radicals under 325 nm light excitation. Here, the hydroxyl radicals of different samples are generated during visible light catalytic processes.

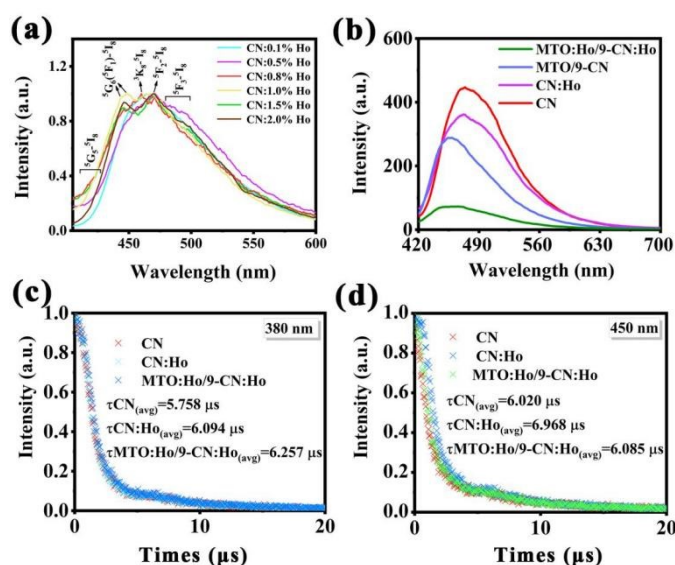

**Figure S24.** (a) The normalized PL spectra of different samples under 317 nm light excitation (2.5 nm for spectral resolution (FWHM) of the spectrophotometer and 700



V for PMT voltage). (b) PL spectra of different samples under 400 nm light excitation (5 nm for spectral resolution (FWHM) of the spectrophotometer and 400 V for PMT voltage). (c,d) Fluorescence lifetimes ( $\lambda_{em} = 480$  nm) of different samples excited at 450 nm and 380 nm.

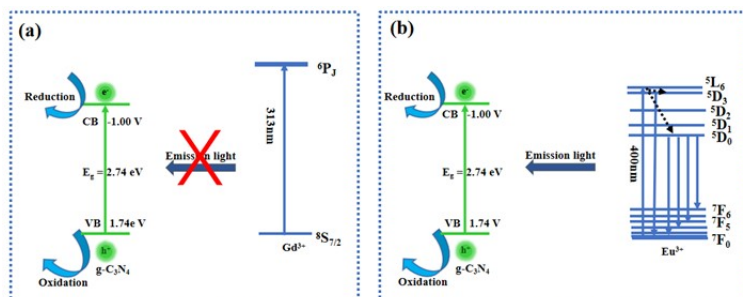

**Figure S25.** (a) Schematic diagrams of the reason why Gd ions can't help  $g\text{-C}_3\text{N}_4:\text{Gd}^{3+}$  absorb visible light. (b) The Schematic diagrams of visible light absorption process of  $g\text{-C}_3\text{N}_4:\text{Eu}^{3+}$  assisted by  $\text{Eu}^{3+}$  ions.

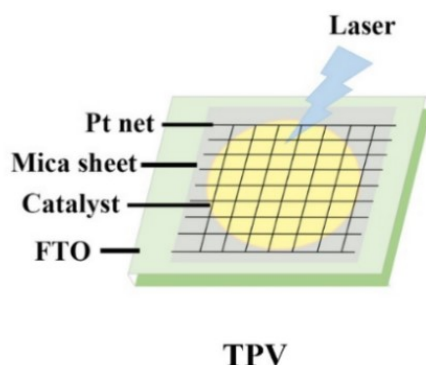

**Figure S26.** Schematic diagram of TPV test device.

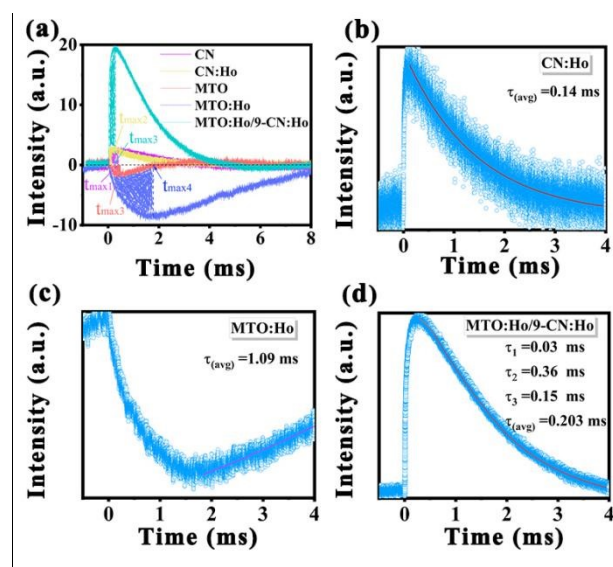

**Figure S27.** TPV curves of different samples.

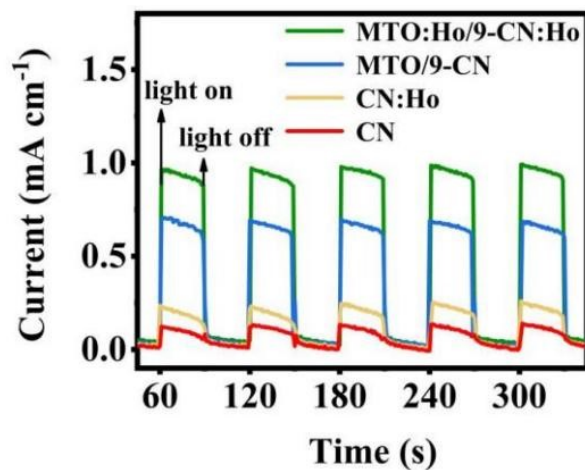

Figure S28. Transient photocurrent curves.

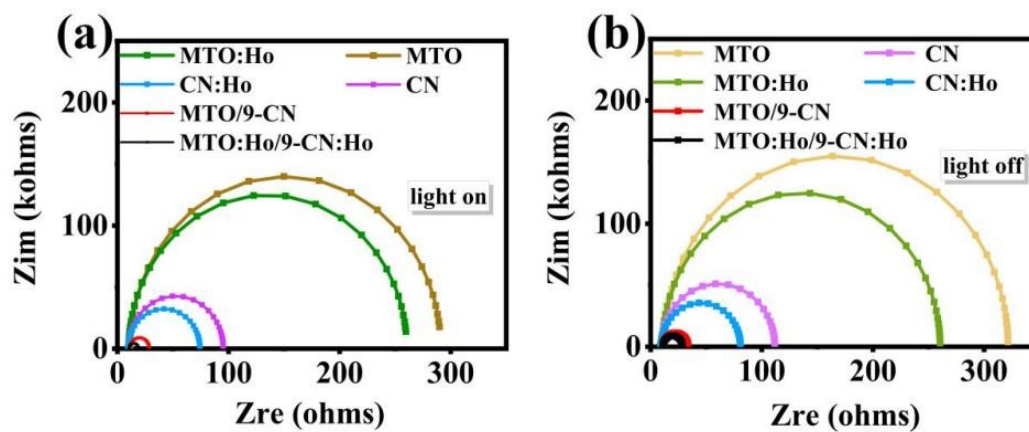

Figure S29. EIS spectra of different samples when light was turned on and turned off.

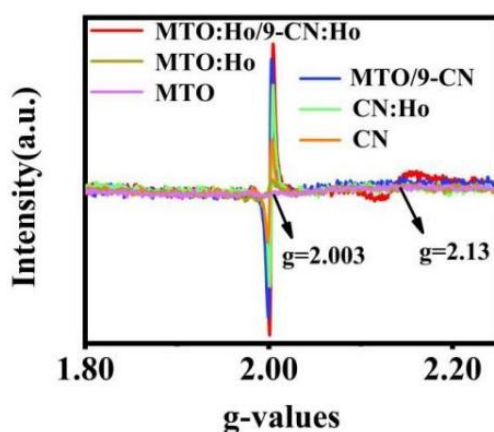

Figure S30. Electron paramagnetic resonance spectra of different samples.

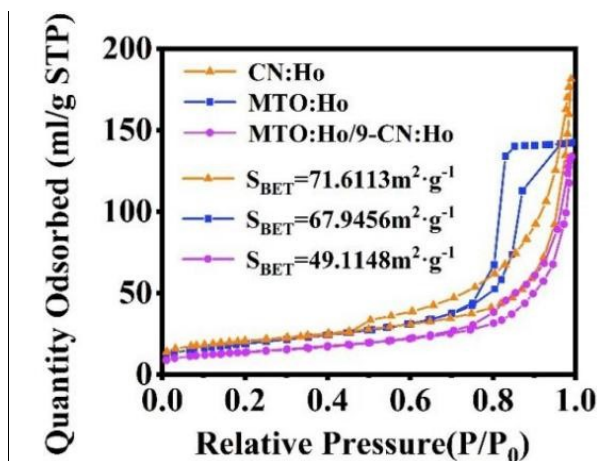

**Figure S31.** Nitrogen adsorption-desorption isotherms of CN:Ho, MTO:Ho, and MTO:Ho/9-CN:Ho.

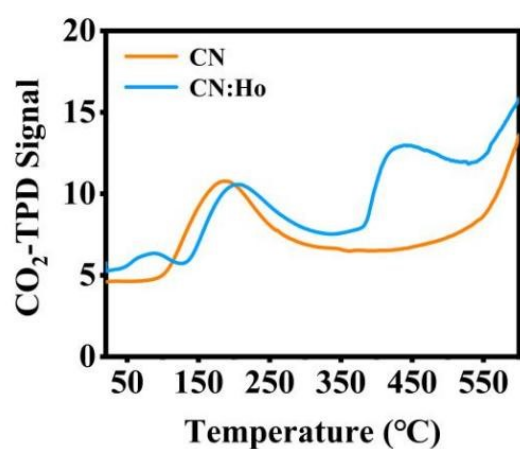

**Figure S32.** CO<sub>2</sub>-TPD profiles of CN and CN:Ho.

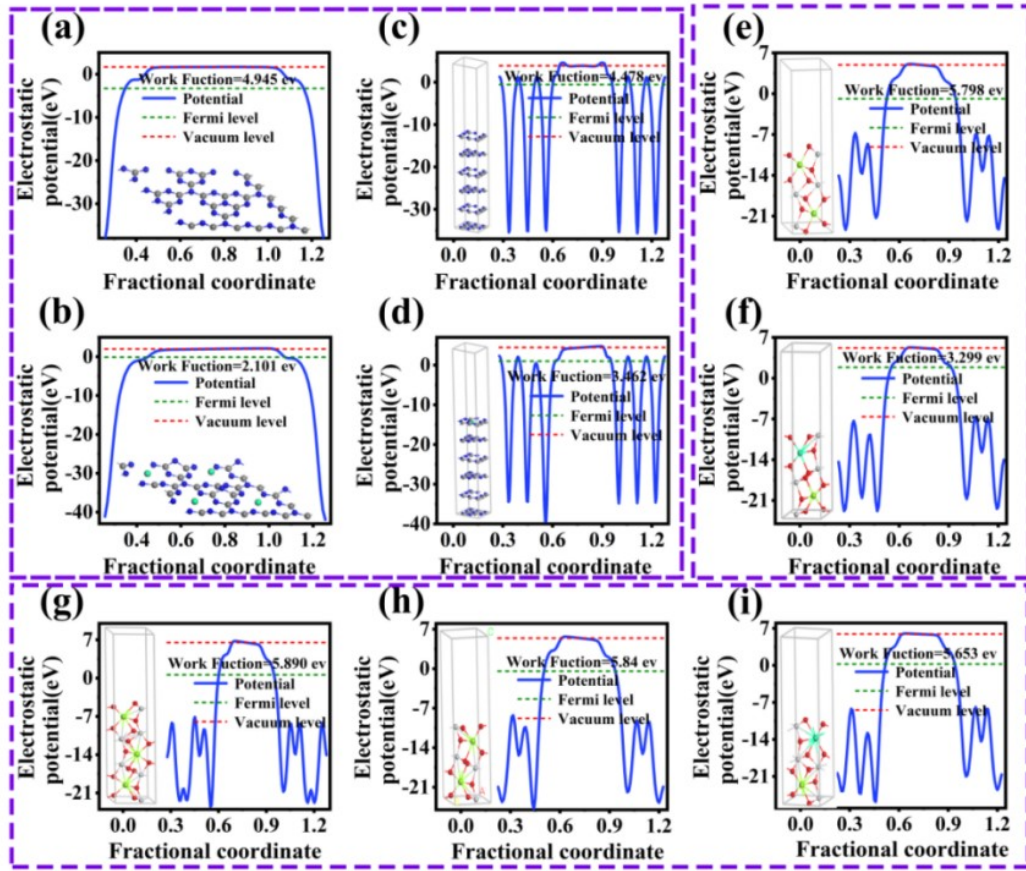

**Figure S33.** The optimized geometric structures and the calculated work functions of (a,b) single layer CN and CN:Ho, (c,d) multilayer CN and CN:Ho, (e)  $\text{MgTi}_2\text{O}_5$ , (f)  $\text{MgTi}_2\text{O}_5$ :Ho, (g,h)  $\text{Mg}_{1.2}\text{Ti}_{1.8}\text{O}_5$  with different layers, and (i)  $\text{Mg}_{1.2}\text{Ti}_{1.8}\text{O}_5$ :Ho.

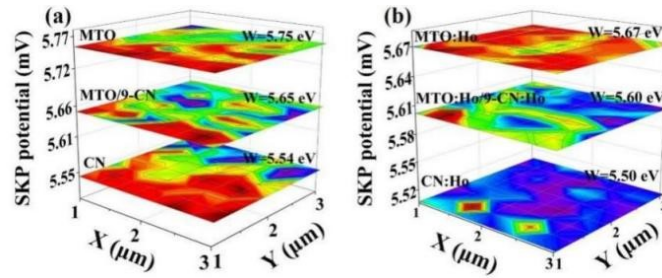

**Figure S34.** Work function diagrams of different samples.

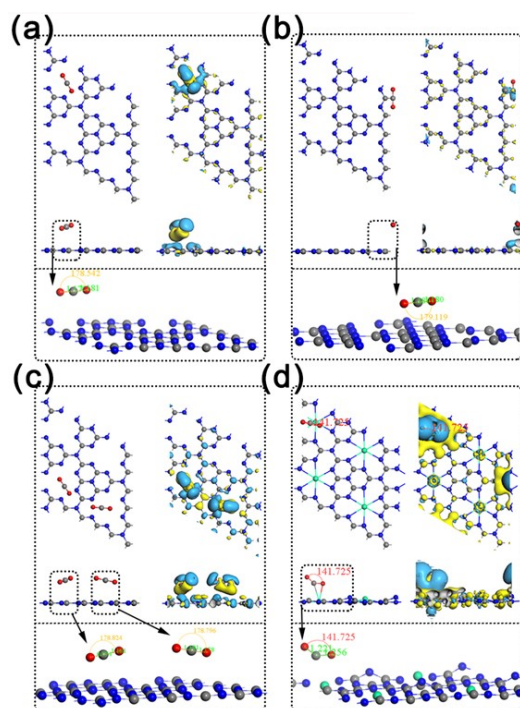

**Figure S35.** The CO<sub>2</sub> adsorption sites and the charge density difference of the (001) surface of (a-c) g-C<sub>3</sub>N<sub>4</sub>, and (d) g-C<sub>3</sub>N<sub>4</sub>:Ho formed by connecting 3-s-triazines as structural units.

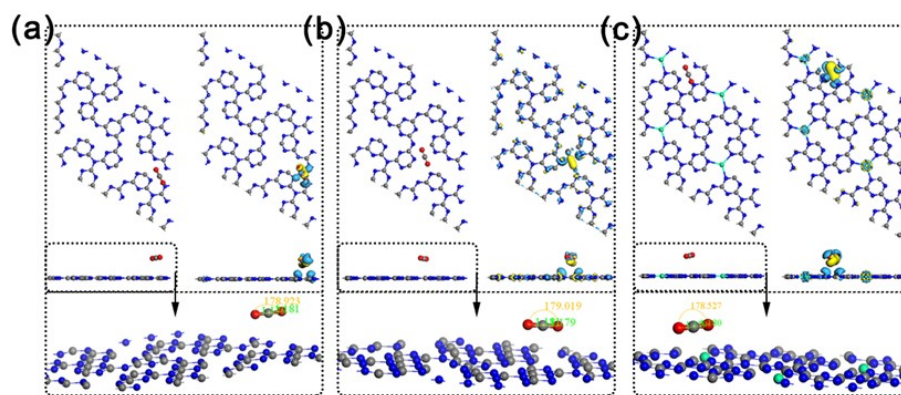

**Figure S36.** The CO<sub>2</sub> adsorption sites and the charge density difference of the (001) surface of (a,b) g-C<sub>3</sub>N<sub>4</sub>, and (c) g-C<sub>3</sub>N<sub>4</sub>:Ho formed by connecting triazine as structural units.

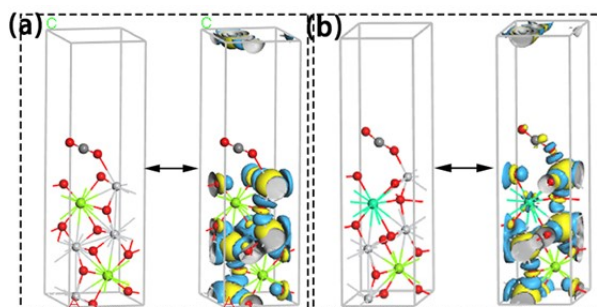

**Figure S37.** The geometric structures and the charge density difference of CO<sub>2</sub> adsorbed (a) Mg<sub>1.2</sub>Ti<sub>1.8</sub>O<sub>5</sub> and (b) Mg<sub>1.2</sub>Ti<sub>1.8</sub>O<sub>5</sub>:Ho.

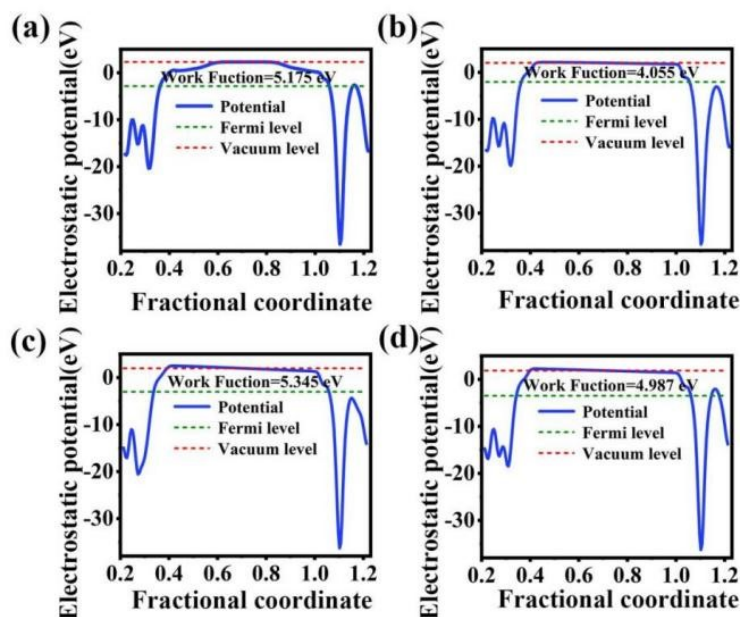

**Figure S38.** The optimized geometric structures and the calculated work functions of different heterostructures: (a,b) MgTi<sub>2</sub>O<sub>5</sub>/CN and MgTi<sub>2</sub>O<sub>5</sub>:Ho/CN:Ho, (c,d) Mg<sub>1.2</sub>Ti<sub>1.8</sub>O<sub>5</sub>/CN and Mg<sub>1.2</sub>Ti<sub>1.8</sub>O<sub>5</sub>:Ho/CN:Ho.

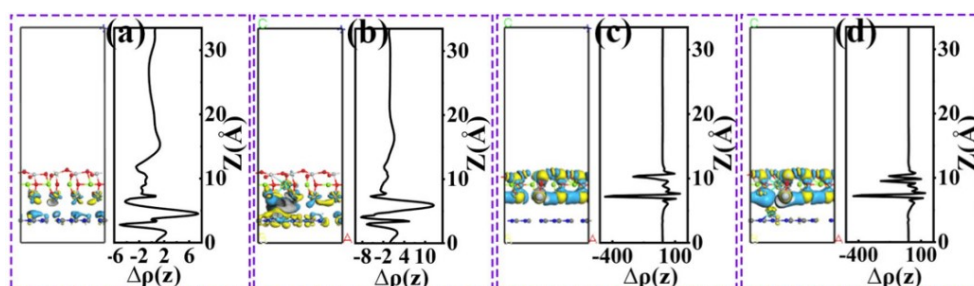

**Figure S39.** The charge density difference of (e) MgTi<sub>2</sub>O<sub>5</sub>/CN, (f) Mg<sub>1.2</sub>Ti<sub>1.8</sub>O<sub>5</sub>/CN, (g) MgTi<sub>2</sub>O<sub>5</sub>:Ho/CN:Ho, and (h,i) Mg<sub>1.2</sub>Ti<sub>1.8</sub>O<sub>5</sub>:Ho/CN:Ho. The results of the conventional XPS and DFT theoretical calculations indicate that the interface electric field formation at MTO:Ho and CN:Ho interfaces for MTO:Ho/CN:Ho due to the different Fermi levels of MTO:Ho and CN:Ho. Under UV irradiation, the charges are easily transferred from the CB of Mg<sub>1.2</sub>Ti<sub>1.8</sub>O<sub>5</sub> (Mg<sub>1.2</sub>Ti<sub>1.8</sub>O<sub>5</sub>:Ho) to the VB of CN (CN:Ho) driven by the built-in electric field at the interface.

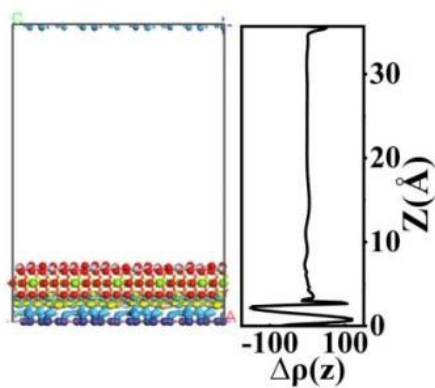

**Figure S40.** The charge density difference of  $\text{Mg}_{1.2}\text{Ti}_{1.8}\text{O}_5\text{:Ho/CN:Ho}$ .

### References:

1. Funke, H.; Scheinost, A. C.; Chukalina, M. Wavelet analysis of extended X-ray absorption fine structure data. *Physical Review* 2005, B 71, 094110.
2. B. Ravel and M. Newville, ATHENA, ARTEMIS, HEPHAESTUS: data analysis for X-ray absorption spectroscopy using IFEFFIT, *Journal of Synchrotron Radiation* 12, 537-541 (2005) doi:10.1107/S0909049505012719.
3. Zabinsky, S. I.; Rehr, J. J.; Ankudinov, A.; Albers, R. C.; Eller, M. J. Multiple-Scattering Calculations of X-Ray-Absorption Spectra. *Phys. Rev. B* 1995, 52 (4), 2995-3009.
